# Supplementary material for: Mechanisms Used for Genomic Proliferation by Thermophilic Group II Introns
Source: PubMed Central journal article supplement (PMC2882425; doi:10.1371/journal.pbio.1000391), 2010-06-08
Supplement: pbio.1000391.s005.pdf [file pbio.1000391.s005.pdf]

# Fig. S5

## A. Family F1 alignment

**Tel4d** GTGCGATGCGAAAGCAGCCAGGTGATTGTCCCGTAGCCCAACAAGCTAGAACGGGACCGATTGTTCCCCCAACCGTAGCCTAGGGAGGCATGCGCGAC 100  
**Tel4a** GTGGCAGCGGAAAGCTAGCCAGATGATTGTCCCACTAGCCCAACAAGCTAGAACGGGACCGGTTGTTCCCCCAACCGTAGCCTAGGGAGGCATGCGCGAC 100  
**Tel4b** GTGCGACGCGAAAGCTAGCCAGATGATTGTCCCACTAGCCCAACAAGCTAGAACGGGACCGGTTGTTCCCCCAACCGTAGCCTAGGGAGGCATGCGCGAC 100  
**Tel4c** GTGGCAGCGGAAAGCTAGCCAGATGATTGTCCCACTAGCCCAACAAGCTAGAACGGGACCGGTTGTTCCCCCAACCGTAGCCTAGGGAGGCATGCGCGAC 100  
**Tel4e** GTGCGACGCGAAAGCTAGCCAGATGATTGTCCCACTAGCCCAACAAGCTAGAACGGGACCGGTTGTTCCCCCAACCGTAGCCTAGGGAGGCATGCGCGAC 100  
\*\*\*\*\*

**Tel4d** TGGTAACGGTCAGGTATGAAGCCCTCCCGACAACGGAGCCGAACCGAAAGGTTGAAGCCGAATCCGTGAGGAGGAAGCAACTTTGCCAGCGTCAGGCGA 200  
**Tel4a** TGGTAACGGTCAGGTATGAAGCCCTCCCGACAACGGAGCCGAACCGAAAGGTTGAAGCCGAATCCGTGAGGAGGAAGCAACTTTGCCAGCGTCAGGCGA 200  
**Tel4b** TGGTAACGGTCAGGTATGAAGCCCTCCCGACAACGGAGCCGAACCGAAAGGTTGAAGCCGAATCCGTGAGGAGGAAGCAACTTTGCCAGCGTCAGGCGA 200  
**Tel4c** TGGTAACGGTCAGGTATGAAGCCCTCCCGACAACGGAGCCGAACCGAAAGGTTGAAGCCGAATCCGTGAGGAGGAAGCAACTTTGCCAGCGTCAGGCGA 200  
**Tel4e** TGGTAACGGTCAGGTATGAAGCCCTCCCGACAACGGAGCCGAACCGAAAGGTTGAAGCCGAATCCGTGAGGAGGAAGCAACTTTGCCAGCGTCAGGCGA 200  
\*\*\*\*\*

**Tel4d** TAGGGAGCTAGGCTTGAAGGATGTTGAAAGCCGCAAGTGAAGTACGCCAGAAGCCCTGTTACTATAAACAGGCCAAAGACGCCGATAGGCTGAGCCAAA 300  
**Tel4a** TAGGGAGCTAGGCTTGAAGGATGTTGAAAGCCGCAAGTGAAGTGAAGTACGCCAGAAGCCCTGTTACTATAAACAGGCCAAAGACGCCGATAGGCTGAGCCAAA 300  
**Tel4b** TAGGGAGCTAGGCTTGAAGGATGTTGAAAGCCGCAAGTGAAGTGAAGTACGCCAGAAGCCCTGTTACTATAAACAGGCCAAAGACGCCGATAGGCTGAGCCAAA 300  
**Tel4c** TAGGGAGCTAGGCTTGAAGGATGTTGAAAGCCGCAAGTGAAGTGAAGTACGCCAGAAGCCCTGTTACTATAAACAGGCCAAAGACGCCGATAGGCTGAGCCAAA 300  
**Tel4e** TAGGGAGCTAGGCTTGAAGGATGTTGAAAGCCGCAAGTGAAGTGAAGTACGCCAGAAGCCCTGTTACTATAAACAGGCCAAAGACGCCGATAGGCTGAGCCAAA 300  
\*\*\*\*\*

**Tel4d** TGGCAACGGACTGGTTTCACTGCTGTCTCAGTGGACGGGGACAAAGCTCCGCGGGTAAAGTACCACCTAACCCCTCGCGTCATCTGGTTGGA 400  
**Tel4a** TGGCAACGGACTGGTTTCACTGCTGTCTCAGTGGACGGGGACAAAGTTCCTGCGGGTAAAGTACCACCTAACCCCTCGCGTCATCTGGTTGGA 400  
**Tel4b** TGGCAACGGACTGGTTTCACTGCTGTCTCAGTGGACGGGGACAAAGTTCCTGCGGGTAAAGTACCACCTAACCCCTCGCGTCATCTGGTTGGA 400  
**Tel4c** TGGCAACGGACTGGTTTCACTGCTGTCTCAGTGGACGGGGACAAAGTTCCTGCGGGTAAAGTACCACCTAACCCCTCGCGTCATCTGGTTGGA 400  
**Tel4e** TGGCAACGGACTGGTTTCACTGCTGTCTCAGTGGACGGGGACAAAGTTCCTGCGGGTAAAGTACCACCTAACCCCTCGCGTCATCTGGTTGGA 400  
\*\*\*\*\*

**Tel4d** ACGCGGTAAGCCCGTATCTGCGCTTGAACATTCAGGCAAGCAACCCGTAAGGAATGCTGATGAGGGTGCGGGTATGGGATGCAGGAGAAAGCGAATGC 500  
**Tel4a** ACGCGGTAAGCCCGTATCTTCCGCTTGAACATTCAGGCAAGCAACCCGTAAGGAATGCTGATGAGGGTGCGGGTATGGGATGCAGGAGAAAGCGAATGC 500  
**Tel4b** ACGCGGTAAGCCCGTATCTTCCGCTTGAACATTCAGGCAAGCAACCCGTAAGGAATGCTGATGAGGGTGCGGGTATGGGATGCAGGAGAAAGCGAATGC 500  
**Tel4c** ACGCGGTAAGCCCGTATCTTCCGCTTGAACATTCAGGCAAGCAACCCGTAAGGAATGCTGATGAGGGTGCGGGTATGGGATGCAGGAGAAAGCGAATGC 500  
**Tel4e** ACGCGGTAAGCCCGTATCTTCCGCTTGAACATTCAGGCAAGCAACCCGTAAGGAATGCTGATGAGGGTGCGGGTATGGGATGCAGGAGAAAGCGAATGC 500  
\*\*\*\*\*

**Tel4d** TGGTCTGTAAAGGACCGGATAGGGGTTGAGGAAAGCAACATCAACATCACCCGCGCCGAAAGGGAGCAGACTTCTGCTGGTCTCCCTTTCGAGATAACCT 600  
**Tel4a** TGGTCTGTAAAGGACCGGATAGGGGTTGAGGAAAGCAACATCAACATCACCCGCGCCGAAAGGGAGCAGACTTCTGCTGGTCTCCCTTTCGAGATAACCT 600  
**Tel4b** TGGTCTGTAAAGGACCGGATAGGGGTTGAGGAAAGCAACATCAACATCACCCGCGCCGAAAGGGAGCAGACTTCTGCTGGTCTCCCTTTCGAGATAACCT 600  
**Tel4c** TGGTCTGTAAAGGACCGGATAGGGGTTGAGGAAAGCAACATCAACATCACCCGCGCCGAAAGGGAGCAGACTTCTGCTGGTCTCCCTTTCGAGATAACCT 600  
**Tel4e** TGGTCTGTAAAGGACCGGATAGGGGTTGAGGAAAGCAACATCAACATCACCCGCGCCGAAAGGGAGCAGACTTCTGCTGGTCTCCCTTTCGAGATAACCT 600  
\*\*\*\*\*

**Tel4d** GTAGAACCCTTGAATGGAGACAAGGCAAAATGACGGTGGACCAAAACCTGGTGCAGTACCAACCAACCGGAAATAGTGGCACAGCATAAACTGGGC 700  
**Tel4a** GTAGAACCCTTGAATGGAGACAAGGCAAAATGACGGTGGACCAAAACCTGGTGCAGTACCAACCAACCGGAAATAGTGGCACAGCATAAACTGGGC 700  
**Tel4b** GTAGAACCCTTGAATGGAGACAAGGCAAAATGACGGTGGACCAAAACCTGGTGCAGTACCAACCAACCGGAAATAGTGGCACAGCATAAACTGGGC 700  
**Tel4c** GTAGAACCCTTGAATGGAGACAAGGCAAAATGACGGTGGACCAAAACCTGGTGCAGTACCAACCAACCGGAAATAGTGGCACAGCATAAACTGGGC 700  
**Tel4e** GTAGAACCCTTGAATGGAGACAAGGCAAAATGACGGTGGACCAAAACCTGGTGCAGTACCAACCAACCGGAAATAGTGGCACAGCATAAACTGGGC 700  
\*\*\*\*\*

**Tel4d** CAAAGCCAACCGTAGGTAAGAGGCTGCAAGTGCATCGCAAAGGCTGTGAAGGAAGGACGCTGGGGCAAAGTGAAGCTTTGCAATGGCTCCTGACC 800  
**Tel4a** CAAAGCCAACCGTAGGTAAGAGGCTGCAAGTGCATCGCAAAGGCTGTGAAGGAAGGACGCTGGGGCAAAGTGAAGCTTTGCAATGGCTCCTGACC 800  
**Tel4b** CAAAGCCAACCGTAGGTAAGAGGCTGCAAGTGCATCGCAAAGGCTGTGAAGGAAGGACGCTGGGGCAAAGTGAAGCTTTGCAATGGCTCCTGACC 800  
**Tel4c** CAAAGCCAACCGTAGGTAAGAGGCTGCAAGTGCATCGCAAAGGCTGTGAAGGAAGGACGCTGGGGCAAAGTGAAGCTTTGCAATGGCTCCTGACC 800  
**Tel4e** CAAAGCCAACCGTAGGTAAGAGGCTGCAAGTGCATCGCAAAGGCTGTGAAGGAAGGACGCTGGGGCAAAGTGAAGCTTTGCAATGGCTCCTGACC 800  
\*\*\*\*\*

**Tel4d** CACTCGTTTACGGCAAAGCCCTTGGCGTGAACGGGTAAGTGAACAACCTCAGGCAGTAAACACCTGGTGTGGATGGGATAACCTGGTCCACACAAGAGC 900  
**Tel4a** CACTCGTTTACGGCAAAGCCCTTGGCGTGAACGGGTAAGTGAACAACCTCAGGCAGTAAACACCTGGTGTGGATGGGATAACCTGGTCCACACAAGAGC 900  
**Tel4b** CACTCGTTTACGGCAAAGCCCTCAGGCAGTAAACACCTCAGGCAGTAAACACCTGGTGTGGATGGGATAACCTGGTCCACACAAGAGC 900  
**Tel4c** CACTCGTTTACGGCAAAGCCCTCAGGCAGTAAACACCTCAGGCAGTAAACACCTGGTGTGGATGGGATAACCTGGTCCACACAAGAGC 900  
**Tel4e** CACTCGTTTACGGCAAAGCCCTCAGGCAGTAAACACCTCAGGCAGTAAACACCTGGTGTGGATGGGATAACCTGGTCCACACAAGAGC 900  
\*\*\*\*\*

**Tel4d** AGAAAACCAAGCCATAAAGTCCCTCAGGAGAAGAGGCTATAAGCCTCAACCCCTGAGGCGGGTATATATCCCGAAAGCAAAACAGCGCCCGCT 1000  
**Tel4a** AGAAAACCAAGCCATAAAGTCCCTCAGGAGAAGAGGCTATAAGCCTCAACCCCTGAGGCGGGTATATATCCCGAAAGCAAAACAGCGCCCGCT 1000  
**Tel4b** AGAAAACCAAGCCATAAAGTCCCTCAGGAGAAGAGGCTATAAACCCTCAACCCCTGAGGCGGGTATATATCCCGAAAGCAAAACAGCGCCCGCT 1000  
**Tel4c** AGAAAACCAAGCCATAAAGTCCCTCAGGAGAAGAGGCTATAAACCCTCAACCCCTGAGGCGGGTATATATCCCGAAAGCAAAACAGCGCCCGCT 1000  
**Tel4e** AGAAAACCAAGCCATAAAGTCCCTCAGGAGAAGAGGCTATAAACCCTCAACCCCTGAGGCGGGTATATATCCCGAAAGCAAAACAGCGCCCGCT 1000  
\*\*\*\*\*

**Tel4d** AGGAATCCCGACAATGAGGACAGGGCAATGCAGGCACTATATGCACTAGCCCTAGAACCAGTGCGGAAACACAGCGGACCGGAACTCCTATGGGTT 1100  
**Tel4a** AGGAATCCCGACAATGAGGACAGGGCAATGCAGGCACTATATGCACTAGCCCTAGAACCAGTGCGGAAACACAGCGGACCGGAACTCCTATGGGTT 1100  
**Tel4b** AGGAATCCCGACAATGAGGACAGGGCAATGCAGGCACTATATGCACTAGCCCTAGAACCAGTGCGGAAACACAGCGGACCGGAACTCCTATGGGTT 1100  
**Tel4c** AGGAATCCCGACAATGAGGACAGGGCAATGCAGGCACTATATGCACTAGCCCTAGAACCAGTGCGGAAACACAGCGGACCGGAACTCCTATGGGTT 1100  
**Tel4e** AGGAATCCCGACAATGAGGACAGGGCAATGCAGGCACTATATGCACTAGCCCTAGAACCAGTGCGGAAACACAGCGGACCGGAACTCCTATGGGTT 1100  
\*\*\*\*\*

**Tel4d** CGCCGAGGACGTAGCTGACGACCGCCGCGGCAATGCTTTAACAACCTAGCAAGGGCCGACAGCGCAACCTATGTTCCCGACGCTGATATCTCCGGAT 1200  
**Tel4a** CGCCGAGGACGTATGACGACGATGCGGACAGGCAATGCTTTGCTTGGCAAGGCAAGTCCGCTGAACACGCTCTTGGCGCTGACATATCCGGAT 1200  
**Tel4b** CGCCGAGGACGTATGACGACGATGCGGACAGGCAATGCTTTGCTTGGCAAGGCAAGTCCGCTGAACACGCTCTTGGCGCTGACATATCCGGAT 1200  
**Tel4c** CGCCGAGGACGTATGACGACGATGCGGACAGGCAATGCTTTGCTTGGCAAGGCAAGTCCGCTGAACACGCTCTTGGCGCTGACATATCCGGAT 1200  
**Tel4e** CGCCGAGGACGTATGACGACGATGCGGACAGGCAATGCTTTGCTTGGCAAGGCAAGTCCGCTGAACACGCTCTTGGCGCTGACATATCCGGAT 1200  
\*\*\*\*\*

Tel4d GCTTTGACAATATCAGCCATGAGTGGCTACTAGCAAAATTTCCACTTGACAAGGAAATCTACGGAAAGTGGCTCAAATCGGGTTTGTCTGGAACAGCA 1300  
Tel4a GCTTTGATAACATCAGCCATGAGTGGCTACTAGCAAACTCCACTGGCAAAGGGATCTTACGGAAATGGCTTAAATCTGGGTTCTGCTGGAACAGCA 1300  
Tel4b GCTTTGATAACATCAGCCATGAGTGGCTACTAGCAAACTCCACTGGCAAAGGGATCTTACGGAAATGGCTTAAATCTGGGTTCTGCTGGAACAGCA 1300  
Tel4c GCTTTGATAACATCAGCCATGAGTGGCTACTAGCAAACTCCACTGGCAAAGGGATCTTACGGAAATGGCTTAAATCTGGGTTCTGCTGGAACAGCA 1300  
Tel4e GCTTTGATAACATCAGCCATGAGTGGCTACTAGCAAACTCCACTGGCAAAGGGATCTTACGGAAATGGCTTAAATCTGGGTTCTGCTGGAACAGCA 1300  
\*\*\*\*\*  
Tel4d ACTCTTCCCACCCATGCTGGGACACCCAGGGAGGGTAATCTCCCAGTATTAGCAAACATGGCTCTGGATGGGATGGAAGACTACTGAATGAAGCA 1400  
Tel4a ACTCTTCCCACCCATGCTGGGACACCTCAGGGAGGGTAATCTCCCAGTATTAGCAAACATGGCTCTGGATGGGATGGAAGACTGTTGGCC -AAACA 1399  
Tel4b ACTCTTCCCACCCATGCTGGGACACCTCAGGGAGGGTAATCTCCCAGTATTAGCAAACATGGCTCTGGATGGGATGGAAGACTGTTGGCC -AAACA 1399  
Tel4c ACTCTTCCCACCCATGCTGGGACACCTCAGGGAGGGTAATCTCCCAGTATTAGCAAACATGGCTCTGGATGGGATGGAAGACTGTTGGCC -AAACA 1399  
Tel4e ACTCTTCCCACCCATGCTGGGACACCTCAGGGAGGGTAATCTCCCAGTATTAGCAAACATGGCTCTGGATGGGATGGAAGACTGTTGGCC -AAACA 1399  
\*\*\*\*\*  
Tel4d CTTGAGAAAGCCAAAGTCCATCTCATAGATATGCAGACACTTTGTCGTAAACGGGACAGCAGGGAGACACTGTGTATTGGGCGCAATAATACAG 1500  
Tel4a CCTCAGAGGTCAAAGTCAACCTCATCCGATATGCTGACGATTTTGTCTGACGGGAAAAGATGAGGAAACCTGGGAAAGCCAGAAACCTAATCCAG 1499  
Tel4b CCTCAGAGGTCAAAGTCAACCTCATCCGATATGCTGACGATTTTGTCTGACGGGAAAAGATGAGGAAACCTGGGAAAGCCAGAAACCTAATCCAG 1499  
Tel4c CCTCAGAGGTCAAAGTCAACCTCATCCGATATGCTGACGATTTTGTCTGACGGGAAAAGATGAGGAAACCTGGGAAAGCCAGAAACCTAATCCAG 1499  
Tel4e CCTCAGAGGTCAAAGTCAACCTCATCCGATATGCTGACGATTTTGTCTGACGGGAAAAGATGAGGAAACCTGGGAAAGCCAGAAACCTAATCCAG 1499  
\*\*\*\*\*  
Tel4d AAATTCCTCAAGAAAGGGGCTTACCTATCACCGGAAAGAGCAAAAAATCGTCCATATCGAAGAGGGTTGCACTTTCTCGGATGAAACATCCGCAAGT 1600  
Tel4a GAGTTCCTAAAAGAACGGGCTTGACCTGTCCCGGAGAAGCAAAAAATCGTCCATATGAGGAAGGCTTCGACTTTCTCGGATGGAACATTCGCAAGT 1599  
Tel4b GAGTTCCTAAAAGAACGGGCTTGACCTGTCCCGGAGAAGCAAAAAATCGTCCATATGAGGAAGGCTTCGACTTTCTCGGATGGAACATTCGCAAGT 1599  
Tel4c GAGTTCCTAAAAGAACGGGCTTGACCTGTCCCGGAGAAGCAAAAAATCGTCCATATGAGGAAGGCTTCGACTTTCTCGGATGGAACATTCGCAAGT 1599  
Tel4e GAGTTCCTAAAAGAACGGGCTTGACCTGTCCCGGAGAAGCAAAAAATCGTCCATATGAGGAAGGCTTCGACTTTCTCGGATGGAACATTCGCAAGT 1599  
\*\*\*\*\*  
Tel4d ACAAGGAACTCTCATCAAACTGCGGAAAGAAATATAAAGCGTTCGCCAAGAAAATCCGAGACACACTGAAGCAACTTACAACAGCAACCCAAGA 1700  
Tel4a ACAACGGGTTCTTCTCATCAAACTGCGGAAAGAAAGTAAAGCGTTCCTCAAGAAAATCCGAGACACTTAAGGAACTTAGGACACCAACCCAGGA 1699  
Tel4b ACAACGGGTTCTTCTCATCAAACTGCGGAAAGAAAGTAAAGCGTTCCTCAAGAAAATCCGAGACACTTAAGGAACTTAGGACAGCAACCCAGGA 1699  
Tel4c ACAACGGGTTCTTCTCATCAAACTGCGGAAAGAAAGTAAAGCGTTCCTCAAGAAAATCCGAGACACTTAAGGAACTTAGGACAGCAACCCAGGA 1699  
Tel4e ACAACGGGTTCTTCTCATCAAACTGCGGAAAGAAAGTAAAGCGTTCCTCAAGAAAATCCGAGACACTTAAGGAACTTAGGACAGCAACCCAGGA 1699  
\*\*\*\*\*  
Tel4d AACTGTGATAGAGTGTCAACCAATATCAGGGATGGGCTAACTATCACAAGGCCAAGCATCCAAGAAAACCTTTGCCAAGTGGACCACTCATC 1800  
Tel4a AATCGTATAGACACACTCAACCAATCATTAGAGGTTGGGCCAATATCACAAGGACAAGTCTCTAAGGAAACCTTCAACCGAGTGGACTTCGCCACC 1799  
Tel4b AATCGTATAGACACACTCAACCAATCATTAGAGGTTGGGCCAATATCACAAGGACAAGTCTCTAAGGAAACCTTCAACCGAGTGGACTTCGCCACC 1799  
Tel4c AATCGTATAGACACACTCAACCAATCATTAGAGGTTGGGCCAATATCACAAGGACAAGTCTCTAAGGAAACCTTCAACCGAGTGGACTTCGCCACC 1799  
Tel4e AATCGTATAGACACACTCAACCAATCATTAGAGGTTGGGCCAATATCACAAGGACAAGTCTCTAAGGAAACCTTCAACCGAGTGGACTTCGCCACC 1799  
\*\*\*\*\*  
Tel4d TGGCTAAACTATGGCGATGGGCAAGGCCGCCGCCACCAAAACAACTCCGATGGGTGAAAATAAATACATCATCCAAACCGGAAACAGAACTGGG 1900  
Tel4a TGGCACAAATTTGGCGATGGGCAAGGCCGCCGCCACCAAAACAACTCCGATGGGTGAAAATAAATACATCATCCAAACCGGAAACAGAACTGGG 1899  
Tel4b TGGCACAAATTTGGCGATGGGCAAGGCCGCCGCCACCAAAACAACTCCGATGGGTGAAAATAAATACATCATCCAAACCGGAAACAGAACTGGG 1899  
Tel4c TGGCACAAATTTGGCGATGGGCAAGGCCGCCGCCACCAAAACAACTCCGATGGGTGAAAATAAATACATCATCCAAACCGGAAACAGAACTGGG 1899  
Tel4e TGGCACAAATTTGGCGATGGGCAAGGCCGCCGCCACCAAAACAACTCCGATGGGTGAAAATAAATACATCATCCAAACCGGAAACAGAACTGGG 1899  
\*\*\*\*\*  
Tel4d GTTTCGGTATGCGGACGAAAGACAAGGATGGGAACCGTGGCTAAATACCTAACACAGCCTCTGACACCCGAATCGAGGCCACGTCAAATCAAGGC 2000  
Tel4a GTTTCGGTATGCGGATGAAAGACAAGAACGGGAACTGAGGACCAACGCCTAATCAAAACCTCTGACACCCGAATCCAACGCCACGTCAAATCAAGGC 1999  
Tel4b GTTTCGGTATGCGGATGAAAGACAAGAACGGGAACTGAGGACCAACGCCTAATCAAAACCTCTGACACCCGAATCCAACGCCACGTCAAATCAAGGC 1999  
Tel4c GTTTCGGTATGCGGATGAAAGACAAGAACGGGAACTGAGGACCAACGCCTAATCAAAACCTCTGACACCCGAATCCAACGCCACGTCAAATCAAGGC 1999  
Tel4e GTTTCGGTATGCGGATGAAAGACAAGAACGGGAACTGAGGACCAACGCCTAATCAAAACCTCTGACACCCGAATCCAACGCCACGTCAAATCAAGGC 1999  
\*\*\*\*\*  
Tel4d AGACGCCAACCCGCTCTCCAGAAAGTGGACGGAATCTTTAGAAACGCAAGAACTCAAAGAAACCCCGCCCAATACCGGTACACCCGCCGAAACTA 2099  
Tel4a AGACGCCAATCCGTTTCTCCAGAGTGGGCGAATACTTTGAGAAACGCAAGAACTCAAAGAAACCCCGCCCAATACCGGTACACCCGCCGAAACTA 2099  
Tel4b AGACGCCAATCCGTTTCTCCAGAGTGGGCGAATACTTTGAGAAACGCAAGAACTCAAAGAAACCCCGCCCAATACCGGTACACCCGCCGAAACTA 2099  
Tel4c AGACGCCAATCCGTTTCTCCAGAGTGGGCGAATACTTTGAGAAACGCAAGAACTCAAAGAAACCCCGCCCAATACCGGTACACCCGCCGAAACTA 2099  
Tel4e AGACGCCAATCCGTTTCTCCAGAGTGGGCGAATACTTTGAGAAACGCAAGAACTCAAAGAAACCCCGCCCAATACCGGTACACCCGCCGAAACTA 2099  
\*\*\*\*\*  
Tel4d TGGGAAGACAAAATGGCACCTGCCAGTATGCGGGGAGAGATCGAACAAGCATCTTACGAAATCCACCACATCTGCCCAAAACACAAGGGCGGTT 2199  
Tel4a TGGGAAGAACAGGGTGGTATCTGTCCAGTATGCGGGGTAAGAAATGAGCAAGACATGCTCACTGACATCCACCACATATTGCCCAAAACACAAGGGTGGTT 2199  
Tel4b TGGGAAGAACAGGGTGGTATCTGTCCAGTATGCGGGGTAAGAAATGAGCAAGACATGCTCACTGACATCCACCACATATTGCCCAAAACACAAGGGTGGTT 2199  
Tel4c TGGGAAGAACAGGGTGGTATCTGTCCAGTATGCGGGGTAAGAAATGAGCAAGACATGCTCACTGACATCCACCACATATTGCCCAAAACACAAGGGTGGTT 2199  
Tel4e TGGGAAGAACAGGGTGGTATCTGTCCAGTATGCGGGGTAAGAAATGAGCAAGACATGCTCACTGACATCCACCACATATTGCCCAAAACACAAGGGTGGTT 2199  
\*\*\*\*\*  
Tel4d CTGATGACCTGGCAACTTGTCTTAATCCACGCCAAGTCCCAAAACAGGTGCACAGCCAGCGGTGAGCAGCAGCCGGTTCCTCTTGAAGAGGGGCT 2299  
Tel4a CTGACGACCTGGATAATCTTGTCTTAATCCACGCCAAGTCCCAAAACAGGTGCACAGCCAGATGGTCAGCACAGCCGGTCCCTCTTGAAGAGGGGCT 2299  
Tel4b CTGACGACCTGGATAATCTTGTCTTAATCCACGCCAAGTCCCAAAACAGGTGCACAGCCAGATGGTCAGCACAGCCGGTCCCTCTTGAAGAGGGGCT 2299  
Tel4c CTGACGACCTGGATAATCTTGTCTTAATCCACGCCAAGTCCCAAAACAGGTGCACAGCCAGATGGTCAGCACAGCCGGTCCCTCTTGAAGAGGGGCT 2299  
Tel4e CTGACGACCTGGATAATCTTGTCTTAATCCACGCCAAGTCCCAAAACAGGTGCACAGCCAGATGGTCAGCACAGCCGGTCCCTCTTGAAGAGGGGCT 2299  
\*\*\*\*\*  
Tel4d TTGAGAGGCTTGGACGGGATGCGGGAAACTGGCAGTCCGGTCTTAGGGGGTAGGGGGCAGTAATGCCCCCTGCTACCCGCAC 2386  
Tel4a TTGAGAGGCTGAGCCGGATGCTGGGAAACTAGCACGTCGGTCTTAGGGGGTAGGGGGCAGTAATGCCCCCT--GCTACCCGCAC 2384  
Tel4b TTGAGAGGCTGAGCCGGATGCTGGGAAACTAGCACGTCGGTCTTAGGGGGTAGGGGGCAGTAATGCCCCCT--GCTACCCGCAC 2384  
Tel4c TTGAGAGGCTGAGCCGGATGCTGGGAAACTAGCACGTCGGTCTTAGGGGGTAGGGGGCAGTAATGCCCCCT--GCTACCCGCAC 2384  
Tel4e TTGAGAGGCTGAGCCGGATGCTGGGAAACTAGCACGTCGGTCTTAGGGGGTAGGGGGCAGTAATGCCCCCT--GCTACCCGCAC 2384  
\*\*\*\*\*
